# Supplementary material for: Coordination and supramolecular assembly of {Cd2Ge8V12O48} building block and cucurbit[6] to form rotaxane-shaped hybrids
Source: Royal Society of Chemistry journal article supplement (doi:10.1039/c6dt00496b), 2016-01-01
Supplement: c6dt00496b1.pdf [file c6dt00496b1.pdf]

## Supporting Information

### Coordination and supramolecular assembly of {Cd<sub>2</sub>Ge<sub>8</sub>V<sub>12</sub>O<sub>48</sub>} building block and Cucurbit[6] to form rotaxane-shaped hybrids

Mei-Jie Wei, Hong-Ying Zang\*, En-Long Zhou, Kui-Zhan Shao, Bai-Qiao Song, Guo-Gang Shan, Xin-Long Wang\*, Zhong-Min Su

*Institute of Functional Material Chemistry, Key Lab of Polyoxometalate, Science of Ministry of Education, Faculty of Chemistry, Northeast Normal University, Changchun, 130024, Jilin, People's Republic of China. E-mail: [zanghy100@nenu.edu.cn](mailto:zanghy100@nenu.edu.cn); [wangxl824@nenu.edu.cn](mailto:wangxl824@nenu.edu.cn) Fax: +860431-85684009; Tel: +860431-85099108*

‡ Crystal data for **1**: C<sub>58</sub>H<sub>180</sub>N<sub>46</sub>O<sub>128</sub>V<sub>24</sub>Ge<sub>16</sub>Cd<sub>8</sub>; *P*-1; *a* = 12.434(5) Å, *b* = 12.685(5) Å, *c* = 30.441(5) Å; *V* = 4647(3) Å<sup>3</sup>; *Z* = 1; 26717 reflns measured, 16334 unique (*R*<sub>int</sub> = 0.0515); final *R*<sub>*f*</sub> = 0.0549, *wR*<sub>2</sub> = 0.1309 for 16334 observed reflections [*I* > 2σ(*I*)]. CCDC- (1403847) contains the supplementary crystallographic data for this paper. These data can be obtained free of charge from the Cambridge Crystallographic Data Centre via [www.ccdc.cam.ac.uk/data\\_request/cif](http://www.ccdc.cam.ac.uk/data_request/cif) for **1**.

‡ Crystal data for **2**: C<sub>46</sub>H<sub>98</sub>N<sub>34</sub>O<sub>67</sub>V<sub>12</sub>Ge<sub>8</sub>Cd<sub>4</sub>; *C*2/*c*; *a* = 15.524(5) Å, *b* = 19.795(5) Å, *c* = 36.902(5) Å; *V* = 11306(5) Å<sup>3</sup>; *Z* = 4; 32176 reflns measured, 9937 unique (*R*<sub>int</sub> = 0.0617); final *R*<sub>*f*</sub> = 0.0675, *wR*<sub>2</sub> = 0.1914 for 9937 observed reflections [*I* > 2σ(*I*)]. CCDC-(1403848) contains the supplementary crystallographic data for this paper. These data can be obtained free of charge from the Cambridge Crystallographic Data Centre via [www.ccdc.cam.ac.uk/data\\_request/cif](http://www.ccdc.cam.ac.uk/data_request/cif) for **2**.

## Experimental characterization

### Materials and Instrumentation

All reagents were of AR grade and used without further purification. IR spectra (4000-400  $\text{cm}^{-1}$ ) were recorded in KBr discs on a Nicolet Magna 560 IR spectrometer (Resolution: 2  $\text{cm}^{-1}$ , Number of scan: 16 times). Powder X-ray diffraction (PXRD) patterns were recorded on a Siemens D 5005 diffractometer with Cu-K $\alpha$  ( $\lambda = 1.5418 \text{ \AA}$ ) radiation in the range of 3-50 $^\circ$ C. TGA was performed on a Perkin-Elmer TGA analyzer heated from room temperature to 900 $^\circ$ C under nitrogen gas with a heating rate of 10 $^\circ$ C/min. Variable temperature magnetic susceptibility measurements were carried out in an applied magnetic field of 1000 Oe in the temperature range of 2-300 K with a Quantum Design MPMS XL-7 magnetometer.

### Synthesis of 1.

$\text{NH}_4\text{VO}_3$  (0.0432 g, 0.36 mmol),  $\text{GeO}_2$  (0.0760 g, 0.74 mmol),  $\text{CdCl}_2 \cdot 2.5\text{H}_2\text{O}$  (0.1014 g, 0.36 mmol),  $\text{H}_3\text{BO}_3$  (0.0316 g, 0.52 mmol), and en (0.20 mL) were added to  $\text{H}_2\text{O}$  (10 mL) solution with stirring. The final solution was transferred into a 20 mL Teflon-lined autoclave, before CB6 (0.11 g, 0.11 mmol) was added, then sealed, and kept at 170  $^\circ\text{C}$  for 4 days. After cooling to room temperature, reddish brown crystals were collected (Yield: 0.0518 g, 48.6% based on V). Elem anal. Calcd for  $\text{C}_{58}\text{H}_{180}\text{N}_{46}\text{O}_{144}\text{V}_{24}\text{Ge}_{16}\text{Cd}_8$ : C, 10.16; H, 2.65; N, 9.40%. Found: C, 10.01; H, 2.33; N, 9.18%. IR (KBr):  $\nu = 3331(\text{m}), 3282(\text{m}), 3188(\text{w}), 2929(\text{m}), 2883(\text{w}), 1741(\text{s}), 1682(\text{m}), 1645(\text{m}), 1587(\text{w}), 1483(\text{m}), 1458(\text{w}), 1419(\text{m}), 1383(\text{m}), 1329(\text{m}), 1284(\text{w}), 1242(\text{m}), 1194(\text{m}), 1147(\text{w}), 985(\text{s}), 800(\text{s}), 733(\text{w}), 669(\text{m}), 544(\text{m}) \text{ cm}^{-1}$ .

### Synthesis of 2.

$\text{NH}_4\text{VO}_3$  (0.0154 g, 0.13 mmol),  $\text{GeO}_2$  (0.0271 g, 0.26 mmol),  $\text{CdCl}_2 \cdot 2.5\text{H}_2\text{O}$  (0.0362 g, 0.13 mmol),  $\text{H}_3\text{BO}_3$  (0.0113 g, 0.19 mmol), and en (0.071 mL) were added to  $\text{H}_2\text{O}$  (5 mL) solution with stirring. The final solution was transferred into a 20 mL Teflon-lined autoclave, before CB6 (0.057 g, 0.057 mmol) was added, then sealed, and kept at 170  $^\circ\text{C}$  for 4 days. After cooling to room temperature, reddish brown crystals were harvested (Yield: 0.0223 g, 53.8% based on V). Elem anal. Calcd for  $\text{C}_{23}\text{H}_{54}\text{N}_{17}\text{O}_{40}\text{V}_6\text{Ge}_4\text{Cd}_2$ : C, 14.38; H, 2.57; N, 12.40%. Found: C, 14.01; H, 2.35; N, 12.14%. IR (KBr):  $\nu = 3344(\text{m}), 3280(\text{m}), 3195(\text{w}), 2931(\text{m}), 2881(\text{w}), 1740(\text{s}), 1682(\text{m}), 1643(\text{m}), 1589(\text{w}), 1481(\text{m}), 1419(\text{m}), 1380(\text{m}), 1329(\text{m}), 1294(\text{w}), 1240(\text{m}), 1194(\text{m}), 1147(\text{w}), 987(\text{s}), 800(\text{s}), 733(\text{w}), 671(\text{m}), 546(\text{m}) \text{ cm}^{-1}$ .

### X-ray Crystallographic study.

The single-crystal X-ray diffraction measurements were performed at room temperature with a Bruker Apex II CCD using graphite-monochromated Mo-K $\alpha$  radiation ( $\lambda = 0.71073 \text{ \AA}$ ). Absorption corrections were applied using multi-scan technique and performed by using the SADABS program. All of the structures were solved by direct methods<sup>1</sup> and refined by  $F^2$  full-matrix refinement using the SHELXTL package<sup>2</sup> within WINGX<sup>3</sup>. Carbon-bonded hydrogen atoms were placed in geometrically calculated positions; hydrogen atoms on water molecules were not assigned or directly included in the molecule formula. Crystallographic data for **1** and **2** are illustrated in Table S1 and selected bond lengths and angles are listed from Table S2 to Table S5, respectively. In addition, the bond valence sums<sup>4</sup> for terminal O2, O21, O23, O27, O30, O32, O35 and O45 atoms on the Ge atoms in **1** and O3, O4, O18 and O21 atoms on the Ge atoms in **2** are in the range of 0.947 to 1.167, which indicates that these O atoms belong to OH groups. Other

similar OH groups have also been seen in previous reports<sup>5-6</sup>.

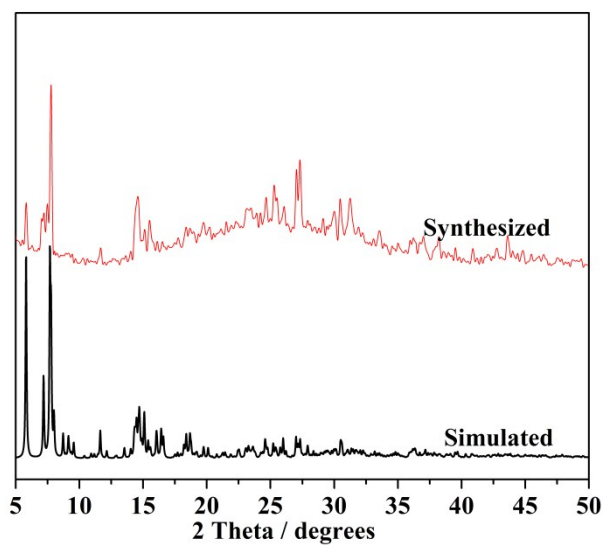

**Fig. S1** The experimental and simulated X-ray powder diffraction patterns of **1**.

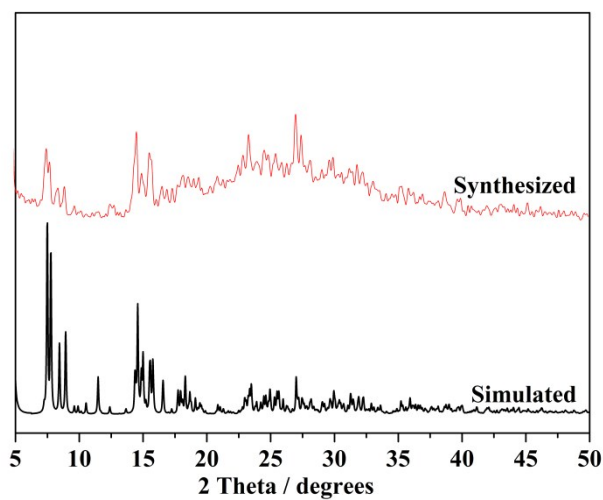

**Fig. S2** The experimental and simulated X-ray powder diffraction patterns of **2**.

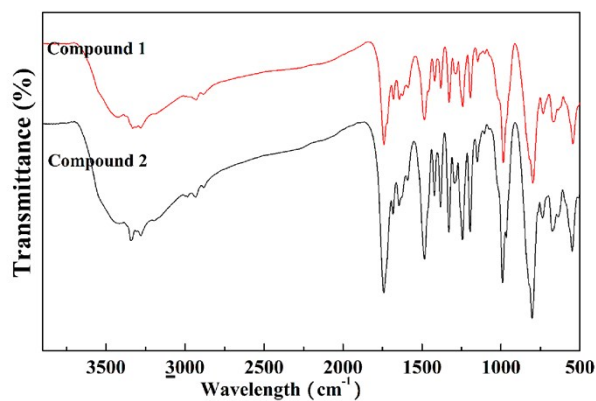

**Fig S3.** Infrared absorption spectrum of compounds **1** and **2**.

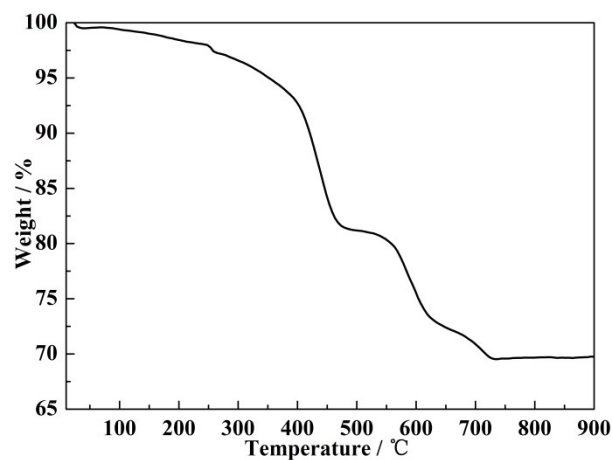

**Fig S4.** TGA curve of compound **1**.

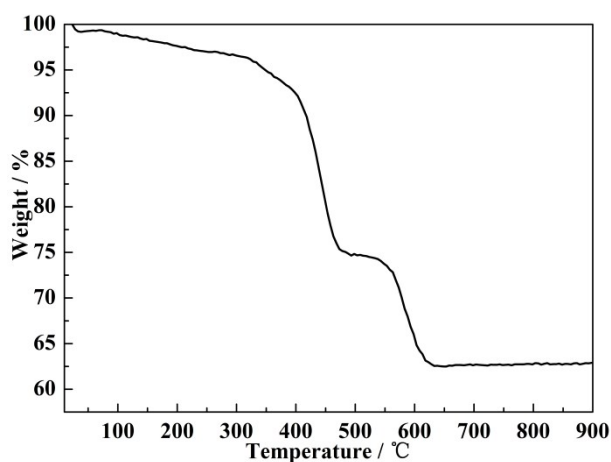

**Fig S5.** TGA curve of compound **2**.

**Table S1.** Crystal data and structure refinements for compound **1** and compound **2**.

| Compound reference                 | <b>1</b>                                      | <b>2</b>                                 |
|------------------------------------|-----------------------------------------------|------------------------------------------|
| Chemical formula                   | $C_{58}H_{180}N_{46}O_{128}V_{24}Ge_{16}Cd_8$ | $C_{46}H_{98}N_{34}O_{67}V_{12}Ge_8Cd_4$ |
| Formula Mass                       | 6853.68                                       | 3841.18                                  |
| Crystal system                     | Triclinic                                     | Monoclinic                               |
| $a/(\text{\AA})$                   | 12.434(5)                                     | 15.524(5)                                |
| $b/(\text{\AA})$                   | 12.685(5)                                     | 19.795(5)                                |
| $c/(\text{\AA})$                   | 30.441(5)                                     | 36.902(5)                                |
| $\alpha/^\circ$                    | 87.927(5)                                     | 90.000(5)                                |
| $\beta/^\circ$                     | 87.149(5)                                     | 94.457(5)                                |
| $\gamma/^\circ$                    | 75.801(5)                                     | 90.000(5)                                |
| Unit cell volume/ $(\text{\AA})^3$ | 4647(3)                                       | 11306(5)                                 |

|                                                          |             |                      |
|----------------------------------------------------------|-------------|----------------------|
| Temperature/K                                            | 293(2)      | 293(2)               |
| Space group                                              | <i>P</i> -1 | <i>C</i> 2/ <i>c</i> |
| No. of formula units per unit cell, <i>Z</i>             | 1           | 4                    |
| No. of reflections measured                              | 26717       | 32176                |
| No. of independent reflections                           | 16334       | 9937                 |
| $R_{int}$                                                | 0.0515      | 0.0617               |
| Final $R_I$ values ( $I > 2\sigma(I)$ ) <sup>a</sup>     | 0.0549      | 0.0675               |
| Final $wR(F_2)$ values ( $I > 2\sigma(I)$ ) <sup>b</sup> | 0.1309      | 0.1914               |
| Final $R_I$ values (all data)                            | 0.0974      | 0.0991               |
| Final $wR(F_2)$ values (all data)                        | 0.1526      | 0.2158               |
| Goodness of fit on $F_2$                                 | 1.008       | 1.013                |

$$^a R_I = \sum ||F_o| - |F_c|| / \sum |F_o|. \quad ^b wR_2 = \sqrt{\sum w(|F_o|^2 - |F_c|^2)^2} / \sum w(F_o^2)^{1/2}$$

**Table S2.** Selected bond lengths [ $\text{\AA}$ ] for compound **1**.

|            |          |             |          |
|------------|----------|-------------|----------|
| V(1)-O(22) | 1.620(7) | Ge(1)-O(28) | 1.715(6) |
| V(1)-O(10) | 1.930(7) | Ge(1)-O(19) | 1.730(7) |
| V(1)-O(25) | 1.944(7) | Ge(1)-O(27) | 1.760(7) |
| V(1)-O(9)  | 1.945(6) | Ge(1)-O(26) | 1.768(7) |
| V(1)-O(24) | 1.970(7) | Ge(2)-O(21) | 1.717(7) |
| V(2)-O(29) | 1.616(7) | Ge(2)-O(25) | 1.731(6) |
| V(2)-O(15) | 1.923(6) | Ge(2)-O(7)  | 1.767(7) |
| V(2)-O(47) | 1.953(7) | Ge(2)-O(26) | 1.782(7) |
| V(2)-O(31) | 1.955(7) | Ge(3)-O(24) | 1.727(7) |
| V(2)-O(28) | 1.970(7) | Ge(3)-O(23) | 1.740(7) |
| V(3)-O(46) | 1.601(7) | Ge(3)-O(11) | 1.761(7) |
| V(3)-O(15) | 1.919(7) | Ge(3)-O(44) | 1.772(6) |
| V(3)-O(47) | 1.923(7) | Ge(4)-O(31) | 1.734(7) |
| V(3)-O(36) | 1.972(7) | Ge(4)-O(30) | 1.743(6) |
| V(3)-O(17) | 2.014(7) | Ge(4)-O(13) | 1.745(7) |
| V(4)-O(16) | 1.599(7) | Ge(4)-O(44) | 1.771(7) |
| V(4)-O(15) | 1.915(6) | Ge(5)-O(45) | 1.712(7) |
| V(4)-O(20) | 1.937(6) | Ge(5)-O(5)  | 1.714(7) |
| V(4)-O(19) | 1.983(7) | Ge(5)-O(36) | 1.737(6) |
| V(4)-O(17) | 1.999(7) | Ge(5)-O(34) | 1.767(7) |
| V(5)-O(18) | 1.611(7) | Ge(6)-O(43) | 1.722(6) |
| V(5)-O(8)  | 1.909(7) | Ge(6)-O(32) | 1.728(7) |
| V(5)-O(20) | 1.935(7) | Ge(6)-O(3)  | 1.744(7) |
| V(5)-O(7)  | 1.992(7) | Ge(6)-O(42) | 1.777(6) |
| V(5)-O(19) | 1.995(6) | Ge(7)-O(2)  | 1.708(7) |
| V(6)-O(6)  | 1.600(7) | Ge(7)-O(40) | 1.727(7) |
| V(6)-O(8)  | 1.933(7) | Ge(7)-O(39) | 1.741(7) |
| V(6)-O(9)  | 1.952(6) | Ge(7)-O(42) | 1.758(7) |

---

|             |          |             |           |
|-------------|----------|-------------|-----------|
| V(6)-O(7)   | 1.965(7) | Ge(8)-O(41) | 1.709(7)  |
| V(6)-O(39)  | 1.979(7) | Ge(8)-O(35) | 1.736(7)  |
| V(7)-O(1)   | 1.604(7) | Ge(8)-O(17) | 1.737(7)  |
| V(7)-O(20)  | 1.935(7) | Ge(8)-O(34) | 1.761(7)  |
| V(7)-O(41)  | 1.961(7) | Cd(1)-N(2)  | 2.271(13) |
| V(7)-O(8)   | 1.962(7) | Cd(1)-N(1)  | 2.333(13) |
| V(7)-O(40)  | 1.970(7) | Cd(2)-N(4)  | 2.285(10) |
| V(8)-O(4)   | 1.603(7) | Cd(2)-N(3)  | 2.384(9)  |
| V(8)-O(38)  | 1.924(7) | Cd(3)-N(8)  | 2.282(10) |
| V(8)-O(10)  | 1.927(7) | Cd(3)-N(7)  | 2.295(11) |
| V(8)-O(3)   | 1.995(6) | Cd(3)-N(13) | 2.434(11) |
| V(8)-O(11)  | 1.996(6) | Cd(4)-N(9)  | 2.257(9)  |
| V(9)-O(12)  | 1.598(7) | Cd(4)-N(11) | 2.281(10) |
| V(9)-O(37)  | 1.918(7) | Cd(4)-N(12) | 2.298(10) |
| V(9)-O(38)  | 1.929(6) | Cd(4)-N(10) | 2.325(9)  |
| V(9)-O(13)  | 1.994(7) | Cd(1)-O(5)  | 2.299(6)  |
| V(9)-O(11)  | 1.995(6) | Cd(1)-O(40) | 2.304(7)  |
| V(10)-O(14) | 1.577(7) | Cd(1)-O(43) | 2.362(7)  |
| V(10)-O(37) | 1.952(7) | Cd(1)-O(41) | 2.366(7)  |
| V(10)-O(47) | 1.958(7) | Cd(2)-O(24) | 2.307(7)  |
| V(10)-O(36) | 1.982(7) | Cd(2)-O(31) | 2.317(7)  |
| V(10)-O(13) | 1.991(7) | Cd(2)-O(28) | 2.325(6)  |
| V(11)-O(33) | 1.608(7) | Cd(2)-O(25) | 2.348(6)  |
| V(11)-O(38) | 1.933(7) | Cd(3)-O(49) | 2.304(7)  |
| V(11)-O(37) | 1.947(7) | Cd(3)-O(50) | 2.428(8)  |
| V(11)-O(43) | 1.958(6) | Cd(3)-O(29) | 2.432(8)  |
| V(11)-O(5)  | 1.970(6) | Cd(4)-O(22) | 2.425(7)  |
| V(12)-O(48) | 1.597(7) | V(1)-V(12)  | 2.793(2)  |
| V(12)-O(9)  | 1.913(7) | V(2)-V(3)   | 2.851(3)  |
| V(12)-O(10) | 1.915(6) | V(3)-V(10)  | 3.003(2)  |
| V(12)-O(3)  | 2.016(7) | V(3)-V(4)   | 3.010(3)  |
| V(12)-O(39) | 2.018(6) | V(4)-V(5)   | 3.026(2)  |
|             |          | V(5)-V(7)   | 2.854(3)  |
|             |          | V(5)-V(6)   | 3.015(2)  |
|             |          | V(6)-V(12)  | 3.036(2)  |
|             |          | V(8)-V(12)  | 3.022(2)  |
|             |          | V(8)-V(9)   | 3.038(2)  |
|             |          | V(9)-V(11)  | 2.859(3)  |
|             |          | V(9)-V(10)  | 3.018(2)  |

---

**Table S3.** Selected angles [deg] for compound **1**.

|                  |          |                   |          |
|------------------|----------|-------------------|----------|
| O(22)-V(1)-O(10) | 108.0(3) | O(28)-Ge(1)-O(19) | 115.7(3) |
| O(22)-V(1)-O(25) | 109.5(3) | O(28)-Ge(1)-O(27) | 112.6(3) |
| O(10)-V(1)-O(25) | 142.4(3) | O(19)-Ge(1)-O(27) | 108.6(3) |
| O(22)-V(1)-O(9)  | 105.1(3) | O(28)-Ge(1)-O(26) | 107.8(3) |
| O(10)-V(1)-O(9)  | 84.6(3)  | O(19)-Ge(1)-O(26) | 104.4(3) |
| O(25)-V(1)-O(9)  | 87.8(3)  | O(27)-Ge(1)-O(26) | 107.2(3) |
| O(22)-V(1)-O(24) | 107.0(3) | O(21)-Ge(2)-O(25) | 115.0(3) |
| O(10)-V(1)-O(24) | 87.5(3)  | O(21)-Ge(2)-O(7)  | 107.3(3) |
| O(25)-V(1)-O(24) | 79.7(3)  | O(25)-Ge(2)-O(7)  | 114.8(3) |
| O(9)-V(1)-O(24)  | 147.8(3) | O(21)-Ge(2)-O(26) | 109.2(3) |
| O(29)-V(2)-O(15) | 104.2(4) | O(25)-Ge(2)-O(26) | 106.0(3) |
| O(29)-V(2)-O(47) | 107.6(3) | O(7)-Ge(2)-O(26)  | 104.0(3) |
| O(15)-V(2)-O(47) | 82.9(3)  | O(24)-Ge(3)-O(23) | 108.5(3) |
| O(29)-V(2)-O(31) | 111.5(4) | O(24)-Ge(3)-O(11) | 115.3(3) |
| O(15)-V(2)-O(31) | 144.2(3) | O(23)-Ge(3)-O(11) | 112.6(3) |
| O(47)-V(2)-O(31) | 88.5(3)  | O(24)-Ge(3)-O(44) | 108.3(3) |
| O(29)-V(2)-O(28) | 104.9(4) | O(23)-Ge(3)-O(44) | 106.0(3) |
| O(15)-V(2)-O(28) | 89.6(3)  | O(11)-Ge(3)-O(44) | 105.7(3) |
| O(47)-V(2)-O(28) | 147.5(3) | O(31)-Ge(4)-O(30) | 114.5(3) |
| O(31)-V(2)-O(28) | 79.2(3)  | O(31)-Ge(4)-O(13) | 114.8(3) |
| O(46)-V(3)-O(15) | 113.4(4) | O(30)-Ge(4)-O(13) | 107.7(3) |
| O(46)-V(3)-O(47) | 107.6(3) | O(31)-Ge(4)-O(44) | 106.3(3) |
| O(15)-V(3)-O(47) | 83.8(3)  | O(30)-Ge(4)-O(44) | 108.8(3) |
| O(46)-V(3)-O(36) | 107.2(4) | O(13)-Ge(4)-O(44) | 104.1(3) |
| O(15)-V(3)-O(36) | 139.2(3) | O(45)-Ge(5)-O(5)  | 115.5(3) |
| O(47)-V(3)-O(36) | 80.3(3)  | O(45)-Ge(5)-O(36) | 105.7(3) |
| O(46)-V(3)-O(17) | 108.3(3) | O(5)-Ge(5)-O(36)  | 113.7(3) |
| O(15)-V(3)-O(17) | 79.3(3)  | O(45)-Ge(5)-O(34) | 108.2(3) |
| O(47)-V(3)-O(17) | 144.0(3) | O(5)-Ge(5)-O(34)  | 106.8(3) |
| O(36)-V(3)-O(17) | 92.1(3)  | O(36)-Ge(5)-O(34) | 106.5(3) |
| O(16)-V(4)-O(15) | 109.7(3) | O(43)-Ge(6)-O(32) | 111.1(4) |
| O(16)-V(4)-O(20) | 112.8(3) | O(43)-Ge(6)-O(3)  | 111.2(3) |
| O(15)-V(4)-O(20) | 137.4(3) | O(32)-Ge(6)-O(3)  | 111.9(3) |
| O(16)-V(4)-O(19) | 104.9(4) | O(43)-Ge(6)-O(42) | 107.8(3) |
| O(15)-V(4)-O(19) | 88.9(3)  | O(32)-Ge(6)-O(42) | 108.7(3) |
| O(20)-V(4)-O(19) | 79.1(3)  | O(3)-Ge(6)-O(42)  | 105.9(3) |
| O(16)-V(4)-O(17) | 106.0(4) | O(2)-Ge(7)-O(40)  | 114.4(3) |
| O(15)-V(4)-O(17) | 79.7(3)  | O(2)-Ge(7)-O(39)  | 105.7(3) |
| O(20)-V(4)-O(17) | 90.1(3)  | O(40)-Ge(7)-O(39) | 113.8(3) |
| O(19)-V(4)-O(17) | 149.1(3) | O(2)-Ge(7)-O(42)  | 108.7(3) |
| O(18)-V(5)-O(8)  | 112.2(3) | O(40)-Ge(7)-O(42) | 107.5(3) |
| O(18)-V(5)-O(20) | 109.8(3) | O(39)-Ge(7)-O(42) | 106.3(3) |

---

|                  |          |                   |          |
|------------------|----------|-------------------|----------|
| O(8)-V(5)-O(20)  | 84.6(3)  | O(41)-Ge(8)-O(35) | 116.2(4) |
| O(18)-V(5)-O(7)  | 108.5(3) | O(41)-Ge(8)-O(17) | 112.3(3) |
| O(8)-V(5)-O(7)   | 78.5(3)  | O(35)-Ge(8)-O(17) | 108.2(4) |
| O(20)-V(5)-O(7)  | 141.6(3) | O(41)-Ge(8)-O(34) | 108.0(3) |
| O(18)-V(5)-O(19) | 110.0(3) | O(35)-Ge(8)-O(34) | 105.3(3) |
| O(8)-V(5)-O(19)  | 137.7(3) | O(17)-Ge(8)-O(34) | 106.0(3) |
| O(20)-V(5)-O(19) | 78.8(3)  | O(28)-Ge(1)-O(19) | 115.7(3) |
| O(7)-V(5)-O(19)  | 91.0(3)  | O(28)-Ge(1)-O(27) | 112.6(3) |
| O(6)-V(6)-O(8)   | 112.2(3) | O(19)-Ge(1)-O(27) | 108.6(3) |
| O(6)-V(6)-O(9)   | 112.7(3) | O(28)-Ge(1)-O(26) | 107.8(3) |
| O(8)-V(6)-O(9)   | 135.0(3) | O(19)-Ge(1)-O(26) | 104.4(3) |
| O(6)-V(6)-O(7)   | 106.4(3) | O(27)-Ge(1)-O(26) | 107.2(3) |
| O(8)-V(6)-O(7)   | 78.6(3)  | O(21)-Ge(2)-O(25) | 115.0(3) |
| O(9)-V(6)-O(7)   | 88.9(3)  | O(21)-Ge(2)-O(7)  | 107.3(3) |
| O(6)-V(6)-O(39)  | 105.0(3) | O(25)-Ge(2)-O(7)  | 114.8(3) |
| O(8)-V(6)-O(39)  | 90.0(3)  | O(21)-Ge(2)-O(26) | 109.2(3) |
| O(9)-V(6)-O(39)  | 78.7(3)  | O(25)-Ge(2)-O(26) | 106.0(3) |
| O(7)-V(6)-O(39)  | 148.6(3) | O(7)-Ge(2)-O(26)  | 104.0(3) |
| O(1)-V(7)-O(20)  | 106.9(3) | O(24)-Ge(3)-O(23) | 108.5(3) |
| O(1)-V(7)-O(41)  | 106.2(4) | O(24)-Ge(3)-O(11) | 115.3(3) |
| O(20)-V(7)-O(41) | 89.3(3)  | O(23)-Ge(3)-O(11) | 112.6(3) |
| O(1)-V(7)-O(8)   | 107.4(3) | O(24)-Ge(3)-O(44) | 108.3(3) |
| O(20)-V(7)-O(8)  | 83.1(3)  | O(23)-Ge(3)-O(44) | 106.0(3) |
| O(41)-V(7)-O(8)  | 146.3(3) | O(11)-Ge(3)-O(44) | 105.7(3) |
| O(1)-V(7)-O(40)  | 107.9(3) | O(31)-Ge(4)-O(30) | 114.5(3) |
| O(20)-V(7)-O(40) | 145.2(3) | O(31)-Ge(4)-O(13) | 114.8(3) |
| O(41)-V(7)-O(40) | 79.2(3)  | O(30)-Ge(4)-O(13) | 107.7(3) |
| O(8)-V(7)-O(40)  | 88.4(3)  | O(31)-Ge(4)-O(44) | 106.3(3) |
| O(4)-V(8)-O(38)  | 113.0(3) | O(30)-Ge(4)-O(44) | 108.8(3) |
| O(4)-V(8)-O(10)  | 112.4(3) | O(13)-Ge(4)-O(44) | 104.1(3) |
| O(38)-V(8)-O(10) | 134.6(3) | O(45)-Ge(5)-O(5)  | 115.5(3) |
| O(4)-V(8)-O(3)   | 103.3(3) | O(45)-Ge(5)-O(36) | 105.7(3) |
| O(38)-V(8)-O(3)  | 90.7(3)  | O(5)-Ge(5)-O(36)  | 113.7(3) |
| O(10)-V(8)-O(3)  | 79.0(3)  | O(45)-Ge(5)-O(34) | 108.2(3) |
| O(4)-V(8)-O(11)  | 107.3(3) | O(5)-Ge(5)-O(34)  | 106.8(3) |
| O(38)-V(8)-O(11) | 78.3(3)  | O(36)-Ge(5)-O(34) | 106.5(3) |
| O(10)-V(8)-O(11) | 88.4(3)  | O(43)-Ge(6)-O(32) | 111.1(4) |
| O(3)-V(8)-O(11)  | 149.3(3) | O(43)-Ge(6)-O(3)  | 111.2(3) |
| O(12)-V(9)-O(37) | 111.6(3) | O(32)-Ge(6)-O(3)  | 111.9(3) |
| O(12)-V(9)-O(38) | 110.2(3) | O(43)-Ge(6)-O(42) | 107.8(3) |
| O(37)-V(9)-O(38) | 83.7(3)  | O(32)-Ge(6)-O(42) | 108.7(3) |
| O(12)-V(9)-O(13) | 109.7(3) | O(3)-Ge(6)-O(42)  | 105.9(3) |
| O(37)-V(9)-O(13) | 79.6(3)  | O(2)-Ge(7)-O(40)  | 114.4(3) |
| O(38)-V(9)-O(13) | 140.0(3) | O(2)-Ge(7)-O(39)  | 105.7(3) |

---



|                   |          |                   |          |
|-------------------|----------|-------------------|----------|
| O(12)-V(9)-O(11)  | 108.9(3) | O(40)-Ge(7)-O(39) | 113.8(3) |
| O(37)-V(9)-O(11)  | 139.3(3) | O(2)-Ge(7)-O(42)  | 108.7(3) |
| O(38)-V(9)-O(11)  | 78.2(3)  | O(40)-Ge(7)-O(42) | 107.5(3) |
| O(13)-V(9)-O(11)  | 91.3(3)  | O(39)-Ge(7)-O(42) | 106.3(3) |
| O(14)-V(10)-O(37) | 113.3(4) | O(41)-Ge(8)-O(35) | 116.2(4) |
| O(14)-V(10)-O(47) | 110.3(3) | O(41)-Ge(8)-O(17) | 112.3(3) |
| O(37)-V(10)-O(47) | 136.4(3) | O(35)-Ge(8)-O(17) | 108.2(4) |
| O(14)-V(10)-O(36) | 105.6(4) | O(41)-Ge(8)-O(34) | 108.0(3) |
| O(37)-V(10)-O(36) | 88.4(3)  | O(35)-Ge(8)-O(34) | 105.3(3) |
| O(47)-V(10)-O(36) | 79.2(3)  | O(17)-Ge(8)-O(34) | 106.0(3) |
| O(14)-V(10)-O(13) | 107.0(4) | O(5)-Cd(1)-O(40)  | 119.8(2) |
| O(37)-V(10)-O(13) | 78.9(3)  | O(5)-Cd(1)-O(43)  | 65.2(2)  |
| O(47)-V(10)-O(13) | 89.5(3)  | O(40)-Cd(1)-O(43) | 87.4(2)  |
| O(36)-V(10)-O(13) | 147.4(3) | O(5)-Cd(1)-O(41)  | 86.3(2)  |
| O(33)-V(11)-O(38) | 109.9(3) | O(40)-Cd(1)-O(41) | 64.9(2)  |
| O(33)-V(11)-O(37) | 107.1(3) | O(43)-Cd(1)-O(41) | 123.3(3) |
| O(38)-V(11)-O(37) | 82.8(3)  | O(24)-Cd(2)-O(31) | 88.4(2)  |
| O(33)-V(11)-O(43) | 105.8(3) | O(24)-Cd(2)-O(28) | 122.0(3) |
| O(38)-V(11)-O(43) | 89.2(3)  | O(31)-Cd(2)-O(28) | 65.2(2)  |
| O(37)-V(11)-O(43) | 146.9(3) | O(24)-Cd(2)-O(25) | 65.2(2)  |
| O(33)-V(11)-O(5)  | 105.2(3) | O(31)-Cd(2)-O(25) | 119.7(2) |
| O(38)-V(11)-O(5)  | 144.8(3) | O(28)-Cd(2)-O(25) | 83.9(2)  |
| O(37)-V(11)-O(5)  | 88.7(3)  | O(49)-Cd(3)-O(50) | 98.6(3)  |
| O(43)-V(11)-O(5)  | 79.6(3)  | O(49)-Cd(3)-O(29) | 71.2(3)  |
| O(48)-V(12)-O(9)  | 107.4(3) | O(50)-Cd(3)-O(29) | 79.4(3)  |
| O(48)-V(12)-O(10) | 109.7(3) | N(2)-Cd(1)-N(1)   | 72.2(5)  |
| O(9)-V(12)-O(10)  | 85.9(3)  | N(4)-Cd(2)-N(3)   | 74.4(3)  |
| O(48)-V(12)-O(3)  | 110.1(3) | N(8)-Cd(3)-N(7)   | 77.0(4)  |
| O(9)-V(12)-O(3)   | 142.3(3) | N(8)-Cd(3)-N(13)  | 90.4(4)  |
| O(10)-V(12)-O(3)  | 78.8(3)  | N(7)-Cd(3)-N(13)  | 96.5(4)  |
| O(48)-V(12)-O(39) | 110.2(3) | N(9)-Cd(4)-N(11)  | 149.8(3) |
| O(9)-V(12)-O(39)  | 78.6(3)  | N(9)-Cd(4)-N(12)  | 131.9(3) |
| O(10)-V(12)-O(39) | 139.9(3) | N(11)-Cd(4)-N(12) | 77.0(3)  |
| O(3)-V(12)-O(39)  | 91.3(3)  | N(9)-Cd(4)-N(10)  | 77.2(4)  |
|                   |          | N(11)-Cd(4)-N(10) | 96.9(4)  |
|                   |          | N(12)-Cd(4)-N(10) | 119.5(4) |

**Table S4.** Selected bond lengths [ $\text{\AA}$ ] for compound 2.

|              |          |             |           |
|--------------|----------|-------------|-----------|
| V(1)-O(8)    | 1.611(8) | Cd(1)-N(1)  | 2.351(11) |
| V(1)-O(9)    | 1.950(8) | Cd(2)-N(2B) | 2.300(10) |
| V(1)-O(7)    | 1.954(8) | Cd(2)-N(2A) | 2.304(10) |
| V(1)-O(15)#1 | 1.980(8) | Cd(3)-N(14) | 2.231(16) |

|              |           |               |           |
|--------------|-----------|---------------|-----------|
| V(1)-O(6)    | 1.983(8)  | Cd(1)-O(20)   | 2.328(8)  |
| V(2)-O(10)   | 1.602(8)  | Cd(1)-O(17)   | 2.340(7)  |
| V(2)-O(11)   | 1.920(8)  | Cd(2)-O(2)    | 2.334(8)  |
| V(2)-O(9)    | 1.922(8)  | Cd(2)-O(1)    | 2.342(8)  |
| V(2)-O(6)    | 1.971(8)  | Cd(3)-O(25)   | 2.200(11) |
| V(2)-O(5)    | 2.015(8)  | Cd(3)-O(24)   | 2.490(10) |
| V(3)-O(16)   | 1.610(8)  | Cd(3)-O(22)   | 2.520(11) |
| V(3)-O(11)   | 1.918(8)  | Ge(1)-O(2)    | 1.710(8)  |
| V(3)-O(12)   | 1.937(7)  | Ge(1)-O(3)    | 1.736(8)  |
| V(3)-O(13)   | 1.988(8)  | Ge(1)-O(6)    | 1.743(7)  |
| V(3)-O(5)    | 1.995(8)  | Ge(1)-O(29)   | 1.773(8)  |
| V(4)-O(14)   | 1.605(9)  | Ge(2)-O(1)    | 1.715(8)  |
| V(4)-O(7)#1  | 1.908(7)  | Ge(2)-O(5)    | 1.737(8)  |
| V(4)-O(12)   | 1.940(8)  | Ge(2)-O(4)    | 1.741(9)  |
| V(4)-O(13)   | 2.001(8)  | Ge(2)-O(29)   | 1.757(8)  |
| V(4)-O(15)   | 2.007(8)  | Ge(3)-O(20)   | 1.706(8)  |
| V(5)-O(22)   | 1.605(9)  | Ge(3)-O(13)   | 1.735(7)  |
| V(5)-O(11)   | 1.927(8)  | Ge(3)-O(21)   | 1.738(8)  |
| V(5)-O(17)   | 1.953(8)  | Ge(3)-O(19)   | 1.770(7)  |
| V(5)-O(9)    | 1.970(8)  | Ge(4)-O(17)#1 | 1.722(8)  |
| V(5)-O(20)   | 1.981(7)  | Ge(4)-O(18)   | 1.740(8)  |
| V(6)-O(30)   | 1.608(8)  | Ge(4)-O(15)   | 1.741(7)  |
| V(6)-O(12)#1 | 1.945(8)  | Ge(4)-O(19)   | 1.780(8)  |
| V(6)-O(7)    | 1.955(7)  | V(1)-V(2)     | 3.003(3)  |
| V(6)-O(2)    | 1.972(8)  | V(1)-V(4)#1   | 3.015(3)  |
| V(6)-O(1)#1  | 1.980(8)  | V(2)-V(5)     | 2.858(3)  |
| Cd(3)-N(16A) | 2.294(9)  | V(2)-V(3)     | 3.013(3)  |
| Cd(3)-N(15B) | 2.315(10) | V(3)-V(4)     | 3.035(3)  |
| Cd(3)-N(15A) | 2.319(10) | V(4)-V(6)#1   | 2.853(3)  |
| Cd(3)-N(16B) | 2.329(10) |               |           |

**Table S5.** Selected angles [deg] for compound **2**.

|                   |          |                     |          |
|-------------------|----------|---------------------|----------|
| O(8)-V(1)-O(9)    | 111.4(4) | O(20)#1-Cd(1)-O(20) | 123.1(4) |
| O(8)-V(1)-O(7)    | 112.7(4) | O(20)#1-Cd(1)-O(17) | 85.8(3)  |
| O(9)-V(1)-O(7)    | 135.9(3) | O(20)-Cd(1)-O(17)   | 65.9(3)  |
| O(8)-V(1)-O(15)#1 | 106.1(4) | O(17)#1-Cd(1)-O(17) | 119.3(4) |
| O(9)-V(1)-O(15)#1 | 88.9(3)  | O(2)#1-Cd(2)-O(2)   | 121.3(4) |
| O(7)-V(1)-O(15)#1 | 79.2(3)  | O(2)-Cd(2)-O(1)#1   | 64.9(3)  |
| O(8)-V(1)-O(6)    | 106.4(4) | O(2)-Cd(2)-O(1)     | 86.7(3)  |
| O(9)-V(1)-O(6)    | 79.0(3)  | O(1)#1-Cd(2)-O(1)   | 121.1(4) |
| O(7)-V(1)-O(6)    | 88.7(3)  | O(25)-Cd(3)-O(24)   | 98.4(3)  |
| O(15)#1-V(1)-O(6) | 147.5(3) | O(25)-Cd(3)-O(22)   | 70.9(4)  |
| O(10)-V(2)-O(11)  | 110.4(4) | O(24)-Cd(3)-O(22)   | 80.6(3)  |

---

|                    |          |                      |          |
|--------------------|----------|----------------------|----------|
| O(10)-V(2)-O(9)    | 109.1(4) | O(2)-Ge(1)-O(3)      | 114.9(4) |
| O(11)-V(2)-O(9)    | 84.2(3)  | O(2)-Ge(1)-O(6)      | 114.1(4) |
| O(10)-V(2)-O(6)    | 109.5(4) | O(3)-Ge(1)-O(6)      | 106.3(4) |
| O(11)-V(2)-O(6)    | 139.9(3) | O(2)-Ge(1)-O(29)     | 107.0(4) |
| O(9)-V(2)-O(6)     | 80.0(3)  | O(3)-Ge(1)-O(29)     | 108.9(4) |
| O(10)-V(2)-O(5)    | 107.6(4) | O(6)-Ge(1)-O(29)     | 105.2(4) |
| O(11)-V(2)-O(5)    | 79.2(3)  | O(1)-Ge(2)-O(5)      | 112.6(4) |
| O(9)-V(2)-O(5)     | 143.0(3) | O(1)-Ge(2)-O(4)      | 116.4(4) |
| O(6)-V(2)-O(5)     | 91.9(3)  | O(5)-Ge(2)-O(4)      | 107.2(4) |
| O(16)-V(3)-O(11)   | 108.8(4) | O(1)-Ge(2)-O(29)     | 108.2(4) |
| O(16)-V(3)-O(12)   | 112.3(4) | O(5)-Ge(2)-O(29)     | 106.6(4) |
| O(11)-V(3)-O(12)   | 138.9(3) | O(4)-Ge(2)-O(29)     | 105.2(4) |
| O(16)-V(3)-O(13)   | 105.1(4) | O(20)-Ge(3)-O(13)    | 115.3(4) |
| O(11)-V(3)-O(13)   | 89.5(3)  | O(20)-Ge(3)-O(21)    | 113.8(4) |
| O(12)-V(3)-O(13)   | 79.0(3)  | O(13)-Ge(3)-O(21)    | 107.4(4) |
| O(16)-V(3)-O(5)    | 105.6(4) | O(20)-Ge(3)-O(19)    | 107.9(4) |
| O(11)-V(3)-O(5)    | 79.7(3)  | O(13)-Ge(3)-O(19)    | 104.8(3) |
| O(12)-V(3)-O(5)    | 90.4(3)  | O(21)-Ge(3)-O(19)    | 106.9(4) |
| O(13)-V(3)-O(5)    | 149.3(3) | O(17)#1-Ge(4)-O(18)  | 114.3(4) |
| O(14)-V(4)-O(7)#1  | 112.0(4) | O(17)#1-Ge(4)-O(15)  | 115.9(4) |
| O(14)-V(4)-O(12)   | 109.0(4) | O(18)-Ge(4)-O(15)    | 107.3(4) |
| O(7)#1-V(4)-O(12)  | 84.8(3)  | O(17)#1-Ge(4)-O(19)  | 106.2(4) |
| O(14)-V(4)-O(13)   | 109.8(4) | O(18)-Ge(4)-O(19)    | 108.5(4) |
| O(7)#1-V(4)-O(13)  | 138.0(3) | O(15)-Ge(4)-O(19)    | 104.0(4) |
| O(12)-V(4)-O(13)   | 78.7(3)  | O(20)-Cd(1)-N(1)     | 105.9(4) |
| O(14)-V(4)-O(15)   | 108.9(4) | O(17)#1-Cd(1)-N(1)   | 85.9(3)  |
| O(7)#1-V(4)-O(15)  | 79.6(3)  | O(17)-Cd(1)-N(1)     | 151.4(4) |
| O(12)-V(4)-O(15)   | 142.1(3) | O(20)-Cd(1)-N(1)#1   | 119.1(4) |
| O(13)-V(4)-O(15)   | 90.3(3)  | N(2B)-Cd(2)-O(2)#1   | 109.7(8) |
| O(22)-V(5)-O(11)   | 104.1(5) | N(2A)-Cd(2)-O(2)#1   | 93.4(7)  |
| O(22)-V(5)-O(17)   | 111.8(5) | N(2A)#1-Cd(2)-O(2)#1 | 137.5(8) |
| O(11)-V(5)-O(17)   | 144.1(3) | N(2B)-Cd(2)-O(2)     | 116.3(8) |
| O(22)-V(5)-O(9)    | 108.0(4) | N(2A)-Cd(2)-O(2)     | 137.5(8) |
| O(11)-V(5)-O(9)    | 82.8(3)  | N(2B)-Cd(2)-O(1)     | 152.6(7) |
| O(17)-V(5)-O(9)    | 87.6(3)  | N(2B)#1-Cd(2)-O(1)   | 83.9(7)  |
| O(22)-V(5)-O(20)   | 103.8(4) | N(2A)-Cd(2)-O(1)     | 133.2(8) |
| O(11)-V(5)-O(20)   | 89.9(3)  | N(2A)#1-Cd(2)-O(1)   | 96.5(7)  |
| O(17)-V(5)-O(20)   | 80.3(3)  | O(25)-Cd(3)-N(14)    | 90.1(5)  |
| O(9)-V(5)-O(20)    | 148.2(3) | O(25)-Cd(3)-N(16A)   | 168.0(5) |
| O(30)-V(6)-O(12)#1 | 107.1(4) | O(25)-Cd(3)-N(15B)   | 81.9(16) |
| O(30)-V(6)-O(7)    | 107.3(4) | O(25)-Cd(3)-N(15A)   | 88.1(16) |
| O(12)#1-V(6)-O(7)  | 83.4(3)  | O(25)-Cd(3)-N(16B)   | 144.5(6) |
| O(30)-V(6)-O(2)    | 106.2(4) | N(14)-Cd(3)-O(24)    | 169.4(4) |
| O(12)#1-V(6)-O(2)  | 146.7(3) | N(16A)-Cd(3)-O(24)   | 92.9(5)  |

---

|                     |          |                    |           |
|---------------------|----------|--------------------|-----------|
| O(7)-V(6)-O(2)      | 88.7(3)  | N(15B)-Cd(3)-O(24) | 92.7(16)  |
| O(30)-V(6)-O(1)#1   | 107.1(4) | N(15A)-Cd(3)-O(24) | 85.3(16)  |
| O(12)#1-V(6)-O(1)#1 | 89.6(3)  | N(16B)-Cd(3)-O(24) | 94.5(5)   |
| O(7)-V(6)-O(1)#1    | 145.4(3) | N(14)-Cd(3)-O(22)  | 96.4(5)   |
| O(2)-V(6)-O(1)#1    | 78.8(3)  | N(16A)-Cd(3)-O(22) | 115.1(5)  |
|                     |          | N(15B)-Cd(3)-O(22) | 150.6(15) |
|                     |          | N(15A)-Cd(3)-O(22) | 152.5(15) |
|                     |          | N(16B)-Cd(3)-O(22) | 144.2(6)  |

## References

- 1 G. M. Sheldrick, *SHELXS-97: Program for X-ray crystal structure solution*; , University of Göttingen: Göttingen, Germany, 1997.
- 2 G. M. Sheldrick, *SHELXL-97: Program for X-ray Crystal Structure Refinement*; , University of Göttingen: Göttingen, Germany, 1997.
- 3 L. J. Farrugia, *WINGX: A Windows Program for Crystal Structure Analysis*; , University of Glasgow: Glasgow, UK, 1988.
- 4I. D. Brown, D. Altermatt, *Acta Crystallogr.* 1985, B41, 244–247.
- 5T. Whitfield, X. Wang, A. J. Jacobson, *Inorg. Chem.* 2003, **42**, 3728–3733.
- 6J. Zhou, J. Zhang, W. H. Fang and G. Y. Yang, *Chem. - Eur. J.* 2010, **16**, 13253-13261.
